# Supplementary material for: On the mechanism of the direct pathway for formic acid oxidation at a Pt(111) electrode
Source: Royal Society of Chemistry journal article supplement (doi:10.1039/c3cp44074e), 2013-01-01
Supplement: c3cp44074e.pdf [file c3cp44074e.pdf]

Supporting Materials for

# On the Mechanism of the Direct Pathway for Formic Acid Oxidation at Pt Electrode

Jie Xu, Daofu Yuan, Fan Yang, Dong Mei, Zunbiao Zhang and Yan-Xia Chen\*

Hefei National Laboratory for Physical Science at Microscale and Department of Chemical  
Physics, University of Science and Technology of China, Hefei, 230026, China

yachen@ustc.edu.cn

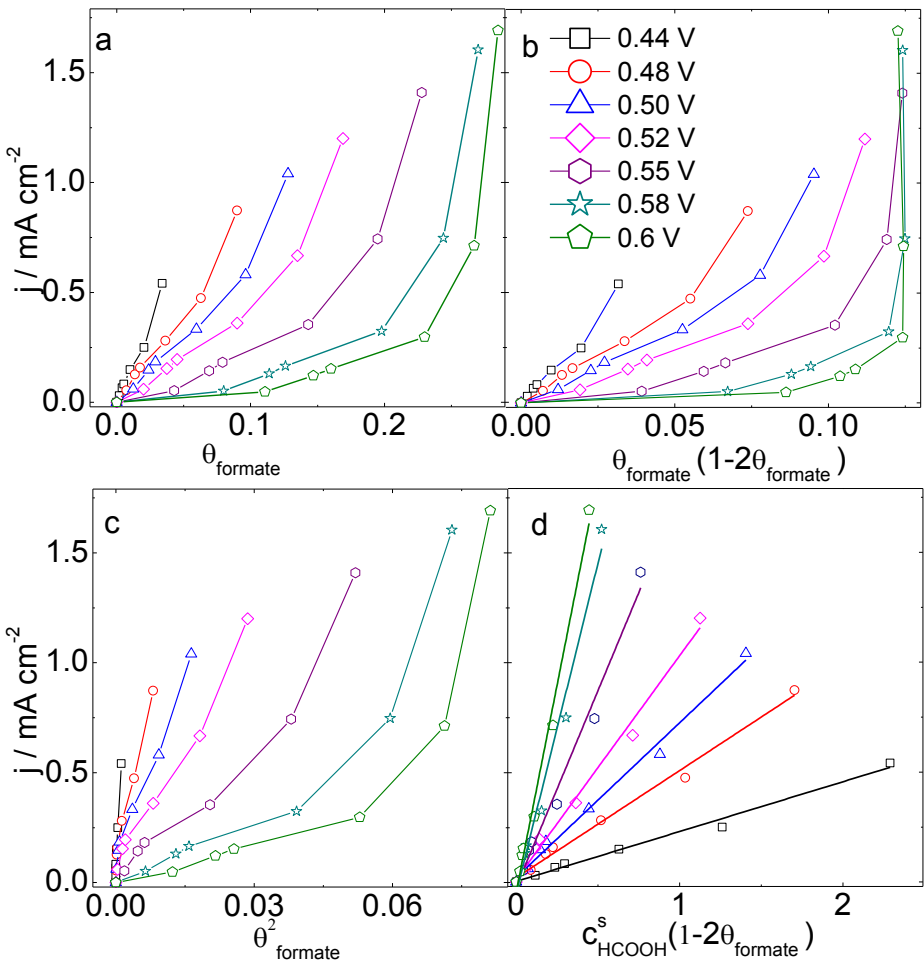

Fig. S1 Current density  $j_{ox}$  for HCOOH oxidation at some selected potentials from 0.44 V to 0.6 V recorded during the positive-going potential scan with a scan rate of 50 mV/s as a function of (a)  $\theta_{formate}$ , (b)  $\theta_{formate}(1-2\theta_{formate})$ , (c)  $\theta_{formate}^2$ , and (d)  $c_{HCOOH}^s(1-2\theta_{formate})$ . Note the data point with  $c_{HCOOH}=10$  mM given in Fig. 7d is from ref. 1.<sup>1</sup>

From the figure it is clearly seen that there is no simple linear relationship between the measured faradaic current density with  $f(\theta)$  based on the first and second order formate pathway mechanism proposed previously by ref.1 and 2,3.<sup>1-3</sup>

## References

1. V. Grozovski, F. J. Vidal-Iglesias, E. Herrero and J. M. Feliu, *Chemphyschem*, 2011, **12**, 1641-1644.
2. M. Osawa, K.-i. Komatsu, G. Samjeske, T. Uchida, T. Ikeshoji, A. Cuesta and C. Gutierrez, *Angew. Chem. Int. Ed.*, 2011, **50**, 1159-1163.
3. A. Cuesta, G. Cabello, M. Osawa and C. Gutierrez, *Acs Catalysis*, 2012, **2**, 728-738.
